# Supplementary material
Source: PubMed Central journal article supplement (PMC6697593)
Supplement: NIHMS1043046-supplement-S1.pdf [file NIHMS1043046-supplement-S1.pdf]

Patient #18 Malar skin changes

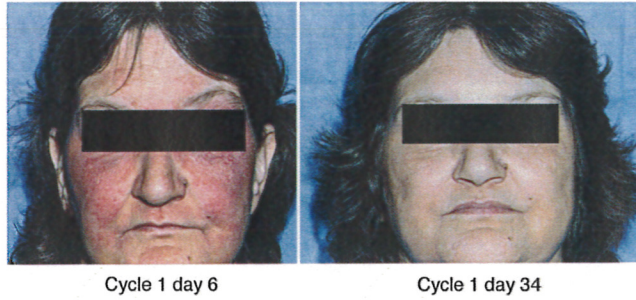

**Supplementary Figure 1:** Patient 18 treated at 2 mcg/kg/day developed a malar “butterfly rash” classically associated with systemic lupus erythematosus but did not develop other findings consistent with this disease nor develop any autoantibodies.
