# Supplementary material
Source: PubMed Central journal article supplement (PMC6697593)
Supplement: NIHMS1043046-supplement-S2.pdf [file NIHMS1043046-supplement-S2.pdf]

**A.**

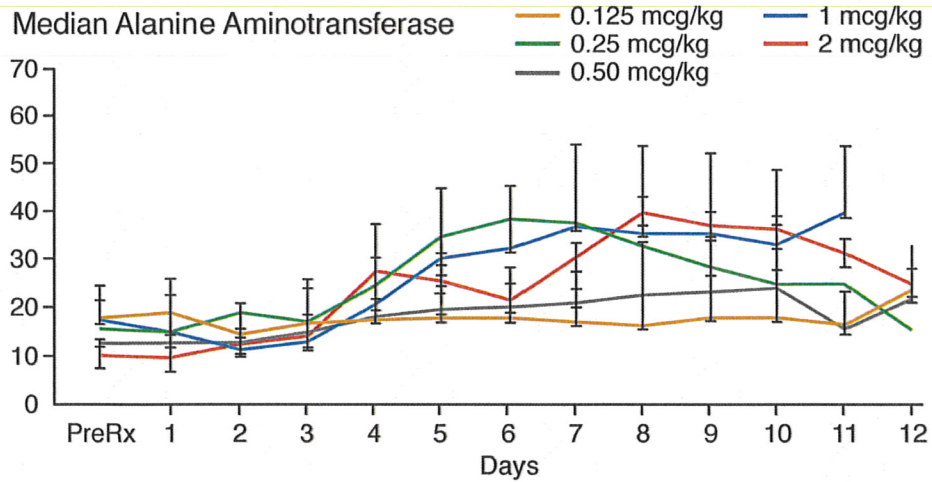

**B.**

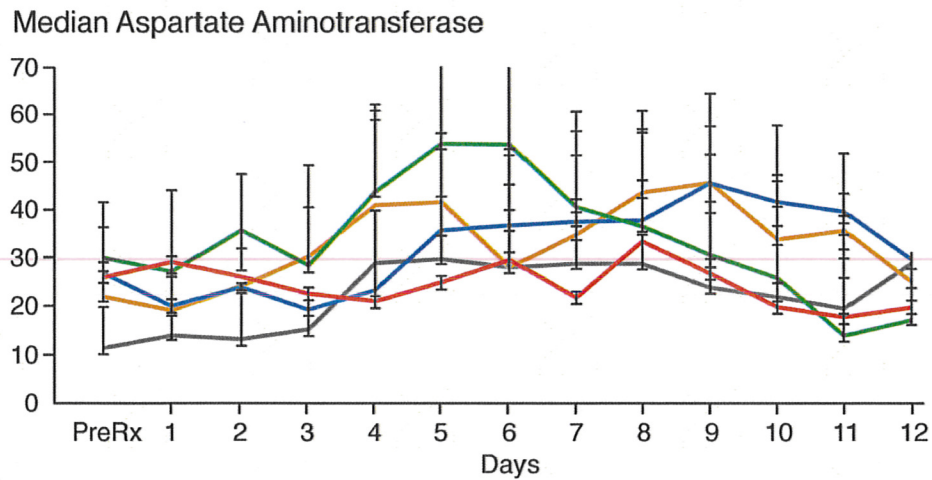

**Supplementary Figure 2:** Transient elevations of liver function tests (ALT and AST) generally beginning the second or third day of treatment occurred in nearly all patients treated at or above 0.5 mcg/kg/day dose level and resolved spontaneously to baseline values during the 10-day treatment course.

**A.** Median Alanine Aminotransferase. **B.** Median Aspartate Aminotransferase.
