# Supplementary material
Source: PubMed Central journal article supplement (PMC6697593)
Supplement: NIHMS1043046-supplement-S3.pdf [file NIHMS1043046-supplement-S3.pdf]

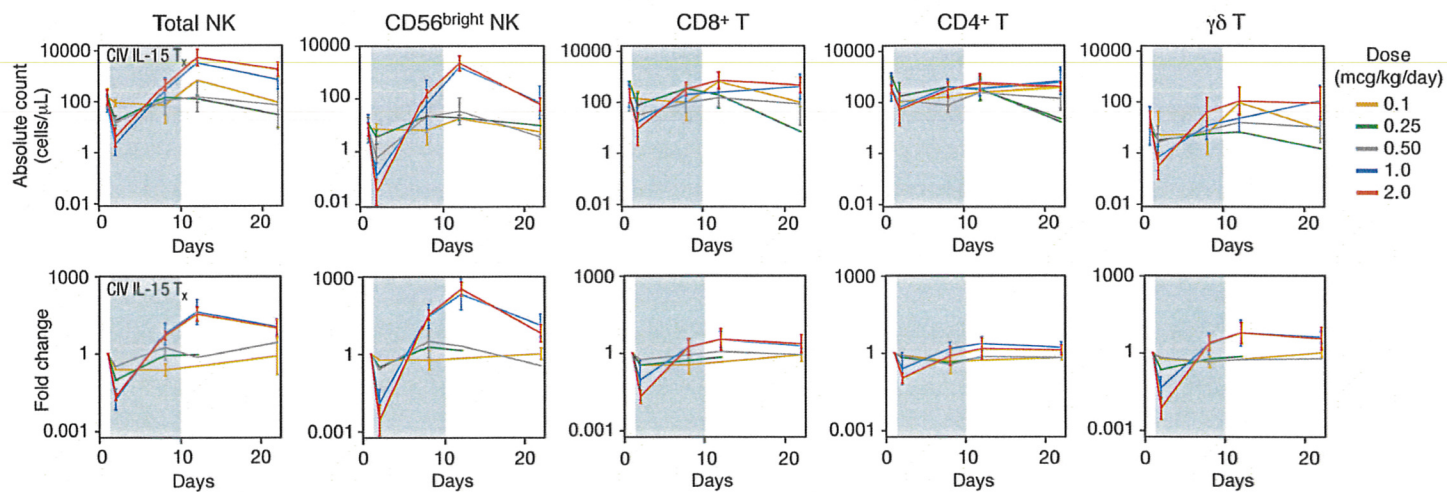

**Supplementary Figure 3.** Fold change and absolute counts (cell/blood) of lymphocyte subsets in patients receiving doses of CIV IL-15 treatment.
