# Supplementary material
Source: PubMed Central journal article supplement (PMC6697593)
Supplement: NIHMS1043046-supplement-S4.pdf [file NIHMS1043046-supplement-S4.pdf]

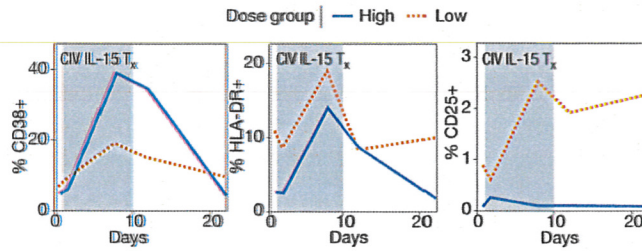

**Supplementary Figure 4: CD8+ T cell activation during CIV rhIL-15 treatment**  
 Percentage of cells positive for the indicated marker from the parental CD8+ T cell population of high and low dose groups. Low dose groups showed CD8+ T cell activation without the expansion seen in high dose groups.
