# Supplementary material
Source: PubMed Central journal article supplement (PMC6697593)
Supplement: NIHMS1043046-supplement-S5.pdf [file NIHMS1043046-supplement-S5.pdf]

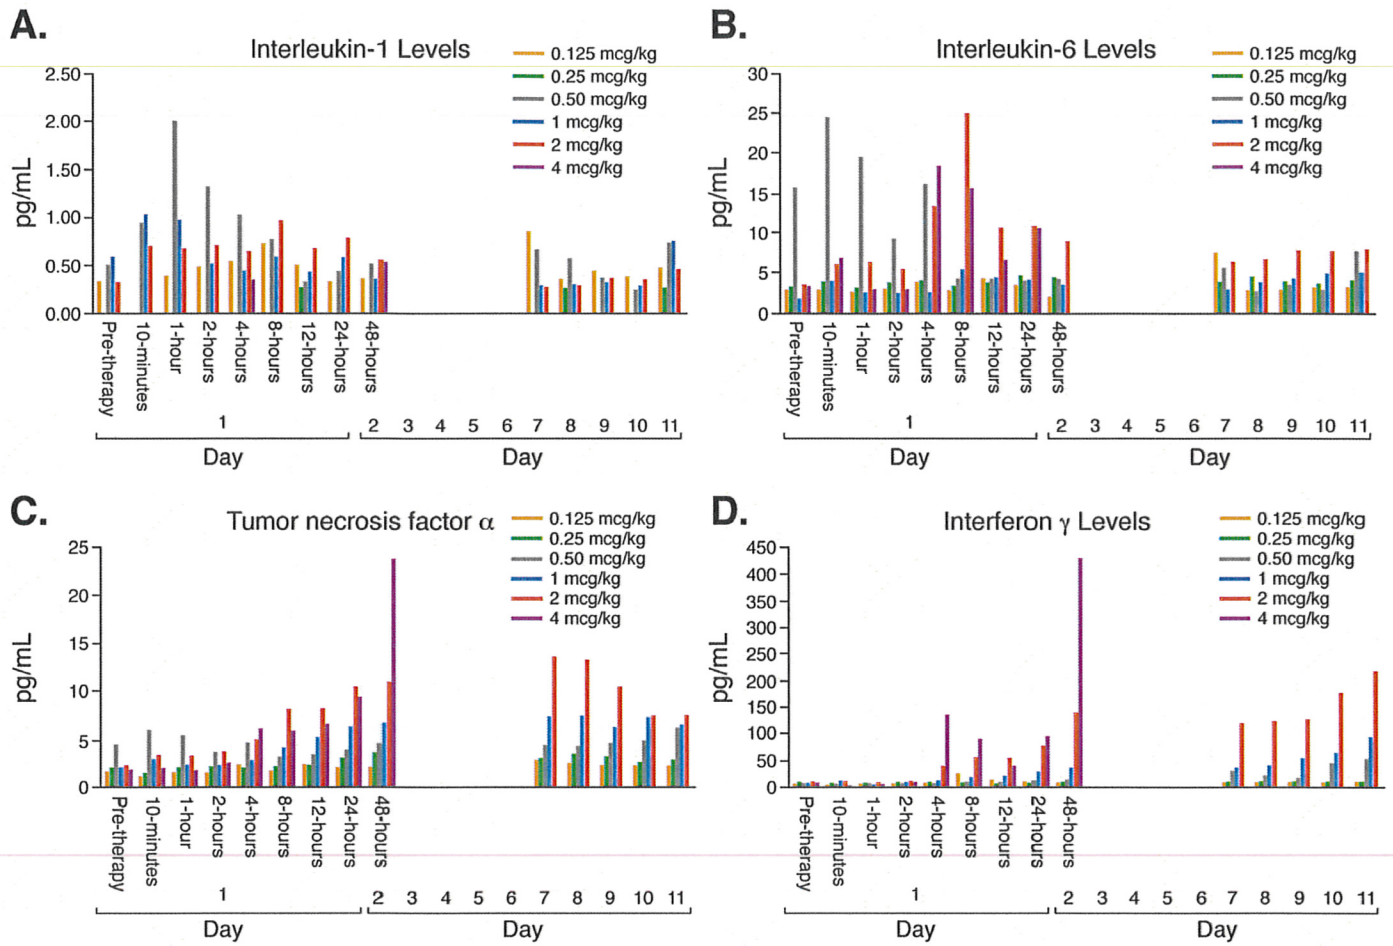

**Supplementary Figure 5A through D: Serum IL-1, IL-6, TNF $\alpha$  and IFN $\gamma$  Levels During CIVrhIL-15 Treatment:** The mean serum levels measured for IL-1, IL-6, TNF $\alpha$  and IFN $\gamma$  are presented as bar graphs. The serum samples used to perform these analyses were obtained at the same time as the PK assessment.
