# Supplementary material
Source: PubMed Central journal article supplement (PMC6697593)
Supplement: NIHMS1043046-supplement-S6.pdf [file NIHMS1043046-supplement-S6.pdf]

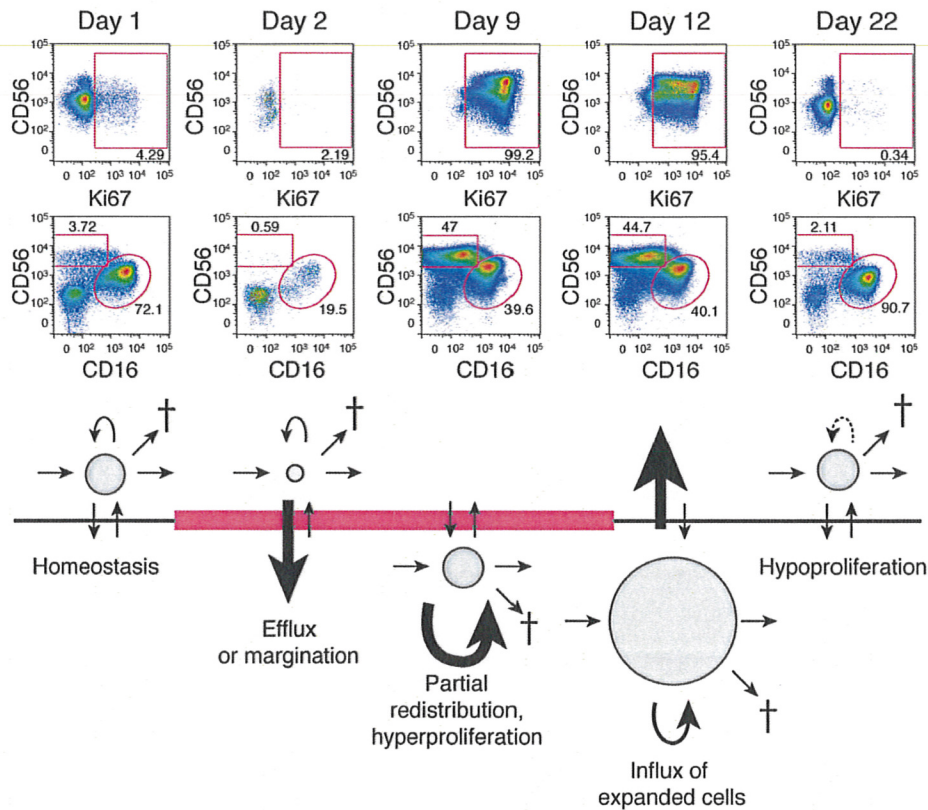

### Supplementary Figure 6 : Model of Interleukin-15 (rhIL-15) Driven Homeostasis

Accompanying IL-15 administration absolute numbers of populations of cells in circulating blood, e.g., natural killer (NK) cells were affected by several pathways. During and immediately after the initiation of infusions there was margination or efflux of NK populations from circulating blood so that they were nearly absent from the circulation. There was then an influx of NK cells, followed by a slow normalization of cells over 2 or 3 days with hyperproliferation yielding absolute NK-cell counts > 10-fold over baseline. In the 1-3 days following termination of IL-15 infusions the expanded cells exited from the tissue and returned to the blood en masse. Subsequently there was hypoproliferation until cell counts returned to baseline, after which normal homeostasis was restored.
