# Supplementary material
Source: PubMed Central journal article supplement (PMC6697593)
Supplement: NIHMS1043046-supplement-S7.pdf [file NIHMS1043046-supplement-S7.pdf]

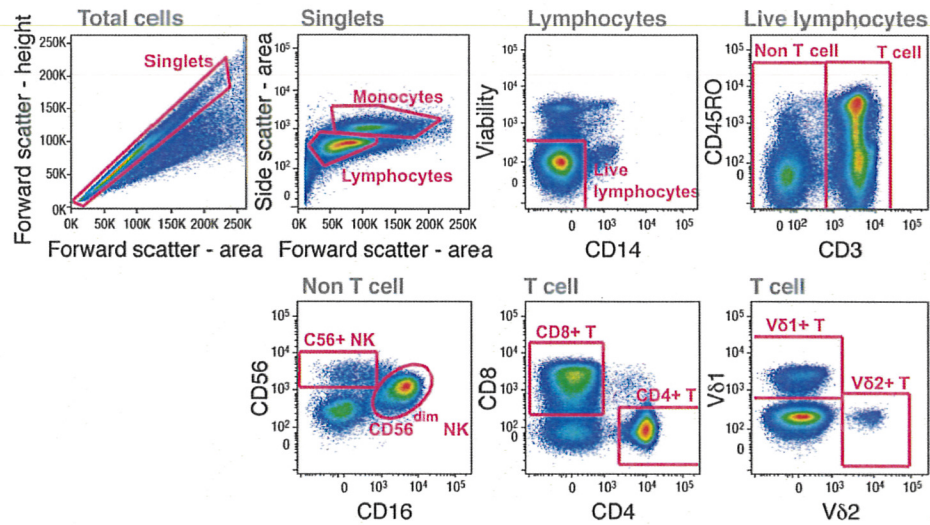

**Supplementary Figure 7:** Representative flow cytometry gating from patient 22, day 1. Gates and population names are in red; Parent populations for each graph are above left, in gray.
